# Supplementary material for: A versatile and highly sensitive homogeneous electrochemical strategy based on the split aptamer binding-induced DNA three-way junction and exonuclease III-assisted target recycling
Source: Royal Society of Chemistry journal article supplement (doi:10.1039/c5an01176k), 2015-01-01
Supplement: c5an01176k1.pdf [file c5an01176k1.pdf]

## Supporting Information

**Versatile and highly sensitive homogeneous electrochemical strategy  
based on split aptamer binding-induced DNA three-way junction and  
exonuclease III-assisted target recycling**

**Ting Hou, Wei Li, Lianfang Zhang and Feng Li\***

College of Chemistry and Pharmaceutical Sciences, Qingdao Agricultural University

Qingdao 266109, China

\* Corresponding author. Tel/Fax: +86-532-86080855

E-mail: lifeng@qust.edu.cn

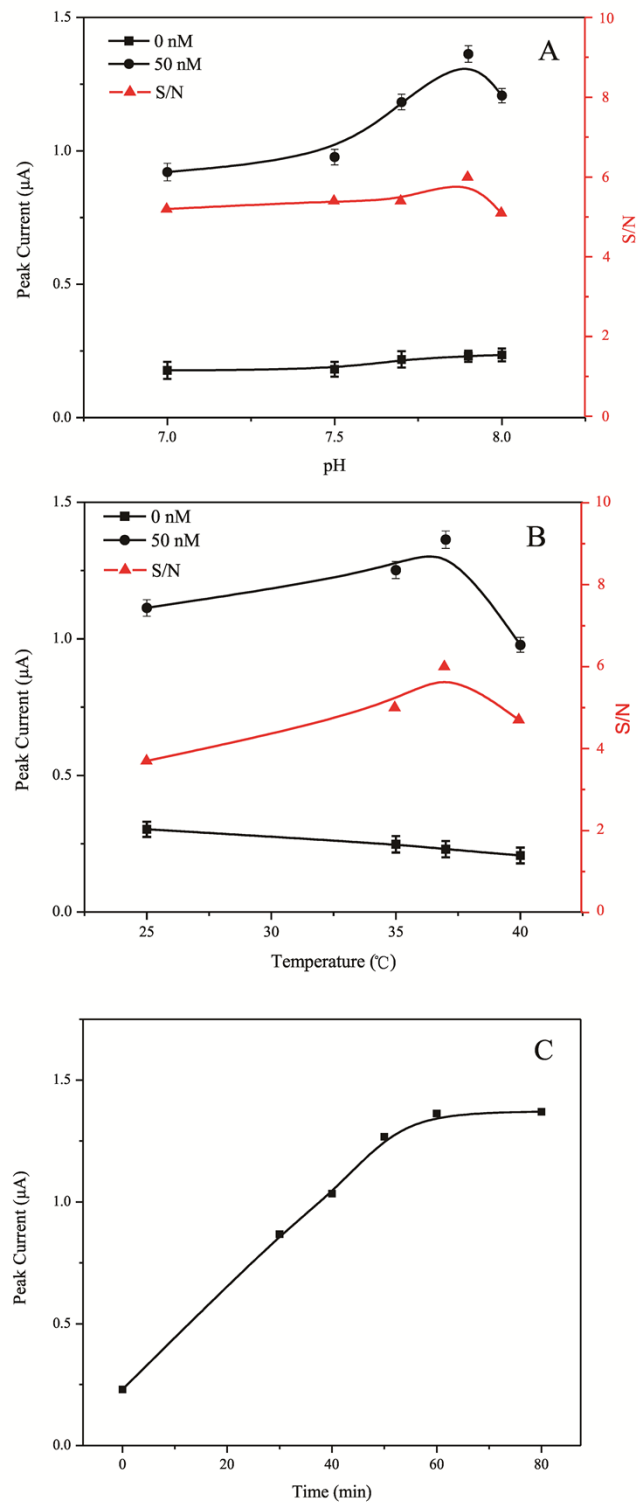

**Fig. S1.** (A) The DPV peak current versus pH value of the buffer solution in the absence and presence of 50 nM ATP, respectively, and the signal-to-noise ratio (S/N) versus pH value. (B) The DPV peak current versus the reaction temperature in the absence and presence of 50 nM ATP, respectively, and the signal-to-noise ratio (S/N) versus the reaction temperature. (C) The DPV peak current versus the reaction time toward the detection of 50 nM ATP.

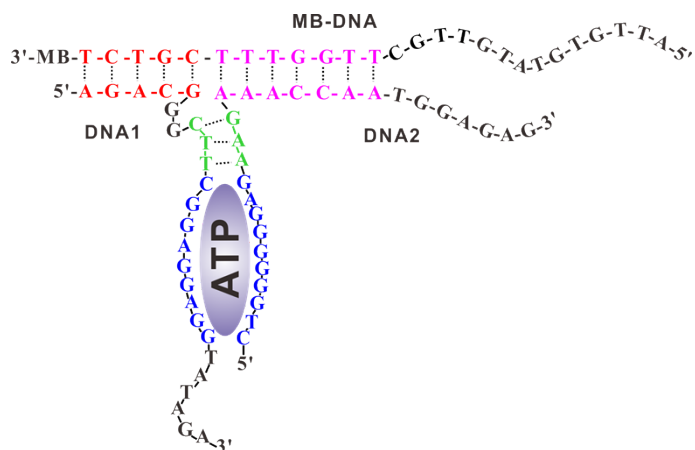

**Fig. S2** The schematic illustration of the DNA three-way junction self-assembled by DNA1, DNA2 and MB-DNA in the presence of the target analyte (ATP).

**Table S1** Sequences of the oligonucleotides used in the experiments <sup>a</sup>

| <b>Name</b> | <b>Sequence (from 5' to 3')</b>                          |
|-------------|----------------------------------------------------------|
| DNA1        | 5'- <u>AGACGGGCTTCGGAGGAGGTATAGA</u> -3'                 |
| DNA2        | 5'-CTGGGGGAGAA <u>GAAACCAAT</u> TGGAGAG-3'               |
| MB-DNA      | 5'-ATTGTGTATGTTGCT <u>TGGTTTCGTCT</u> -methylene blue-3' |

<sup>a</sup> In DNA1 and DNA2, the boldface letters represent the sequences of ATP split aptamer fragments. The italic letters in DNA1 and DNA2, the singly underlined letters in DNA1 and MB-DNA, and the doubly underlined letters in DNA2 and MB-DNA represent the sequences complementary to each other, respectively.

**Table S2** Comparison of analytical performance for ATP detection by our strategy and other electrochemical methods reported in literature

| Method        | Detection Limit<br>(M) | Strategy                                                                                                                                         | Ref.      |
|---------------|------------------------|--------------------------------------------------------------------------------------------------------------------------------------------------|-----------|
| Homogeneous   | $1.0 \times 10^{-10}$  | Split aptamer binding-induced three-way junction and signal amplification by Exo III-assisted target recycling                                   | This work |
| Homogeneous   | $1.0 \times 10^{-9}$   | Aptamer-based strategy with signal amplification by Exo III-assisted ATP recycling                                                               | 1         |
| Heterogeneous | $1.0 \times 10^{-8}$   | Highly generalizable target-responsive electrochemical aptamer switch (TREAS)                                                                    | 2         |
| Heterogeneous | $1.0 \times 10^{-8}$   | Utilization of the aptamer complementary DNA oligonucleotides as probes for electrochemical sensing                                              | 3         |
| Heterogeneous | $1.0 \times 10^{-6}$   | An electrochemical sandwich assay based on split aptamers                                                                                        | 4         |
| Heterogeneous | $1.0 \times 10^{-10}$  | Blank peak current-suppressed electrochemical aptameric sensing platform                                                                         | 5         |
| Heterogeneous | $3.0 \times 10^{-10}$  | Microfluidic electrochemical aptamer-based sensor by constructing Au/Ag dual-metal array three-electrode on-chip                                 | 6         |
| Heterogeneous | $3.0 \times 10^{-8}$   | “Signal on” and one-spot simultaneous detection of multiple small molecular analytes based on electrochemically encoded barcode quantum dot tags | 7         |

### References

- 1 S. F. Liu, Y. Wang, C. X. Zhang, Y. Lin and F. Li, *Chem. Commun.*, 2013, **49**, 2335–2337.
- 2 X. L. Zuo, S. P. Song, J. Zhang, D. Pan, L. H. Wang and C. H. Fan, *J. Am. Chem. Soc.*, 2007, **129**, 1042–1043.
- 3 Y. Lu, X. C. Li, L. M. Zhang, P. Yu, L. Su and L. Q. Mao, *Anal. Chem.*, 2008, **80**, 1883–1890.
- 4 X. L. Zuo, Y. Xiao and K. W. Plaxco, *J. Am. Chem. Soc.*, 2009, **131**, 6944–6945.
- 5 S. Zhang, R. Hu, P. Hu, Z. S. Wu, G. L. Shen and R. Q. Yu, *Nucleic Acids Res.*, 2010, **38**, e185.
- 6 Y. Du, C. G. Chen, M. Zhou, S. J. Dong and E. K. Wang, *Anal. Chem.*, 2011, **83**, 1523–1529.
- 7 H. X. Zhang, B. Y. Jiang, Y. Xiang, Y. Y. Zhang, Y. Q. Chai and R. Yuan, *Anal. Chim. Acta*, 2011, **688**, 99–103.
